# Supplementary material for: Temperature-dependent trion-induced tunability of the terahertz signal response enabled by intraband transitions in monolayer WS 2
Source: Royal Society of Chemistry journal article supplement (doi:10.1039/d4tc04218b), 2024-12-16
Supplement: d4tc04218b1.pdf [file d4tc04218b1.pdf]

## Electronic Supplementary Information (ESI)

### Temperature dependent trion induced tunability of the terahertz signal response enabled by intraband transitions in monolayer WS<sub>2</sub>

Saloni Sharma,<sup>a,b,c</sup> Divyansh Pratap Singh,<sup>a</sup> Shreeya Rane,<sup>d</sup> Jishnu Murukeshan,<sup>c</sup> Tymofii S. Pieshkov,<sup>c,e</sup> Shubhda Srivastava,<sup>a</sup> Soumyabrata Roy,<sup>c</sup> Anand B Puthirath,<sup>c</sup> Guanhui Gao,<sup>f,g</sup> Raturaj Puranik,<sup>h</sup> Utkarsh Pandey,<sup>h</sup> Snehal Haldankar,<sup>h</sup> Vibhavari Parkar,<sup>h</sup> Fathimath Faseela,<sup>h</sup> Shriganesh S. Prabhu,<sup>h</sup> Dibakar Roy Chowdhury,<sup>d</sup> P M Ajayan,<sup>\*c</sup> and Bipin Kumar Gupta<sup>\*a,b</sup>

<sup>a</sup>Photonic Materials Metrology Sub Division, Advanced Materials and Device Metrology Division, CSIR-National Physical Laboratory, Dr. K. S. Krishnan Road, New Delhi-110012, India

<sup>b</sup>Academy of Scientific and Innovative Research (AcSIR), Ghaziabad-201002, India

<sup>c</sup>Department of Materials Science and NanoEngineering, Rice University, 6100 Main Street, Houston, Texas 77005, United States

<sup>d</sup>Mahindra Ecole Centrale, Jeedimetla, Hyderabad, Telangana 500043, India

Present Address: School of Engineering, Anurag University, Ghatkesar, 500088, India

<sup>e</sup>Applied Physics graduate Program, Smalley-Curl Institute, Rice University, Tx, 77005, United States

<sup>f</sup>Electron microscopy center, Material Science and NanoEngineering department, Rice University 6100 Main Street, Houston, Texas 77005, United States

<sup>g</sup>Electron microscopy core, Division of Research, University of Houston 77204, United States

<sup>h</sup>Department of Condensed Matter Physics and Materials Science, Tata Institute of Fundamental Research, Mumbai, Maharashtra 400005, India

E-mail: bipinbhu@yahoo.com

#### S1. Optimization of growth process

The inside view of reaction chamber is shown in Figure S1a, where solid precursors Tungsten-tri-oxide (WO<sub>3</sub> >99.5% Purity, Sigma Aldrich) and sulfur (S >99.5% Purity, Sigma Aldrich) precursors are placed inside the quartz tube. The best growth conditions have been optimized considering several factors such as growth time, growth temperature, ramping rate, distance between the precursors, etc. as shown in Figure S1 b. Ceramic boat named as-B1 (of WO<sub>3</sub> powder) is placed in quartz tube at central zone of the furnace, while two highly resistive Si substrates have been systematically arranged facing upside down on another ceramic boat named as-B2 (of S powder) inside the quartz tube, 17 cm away from the furnace central zone, as illustrated in Figure S1a. The distance has been very critical parameter as it determines the vapour phase reaction rate and dissociated radical ratio rate for appropriate formation of monolayer. The vapour phase reaction is a two-step process: in first step, an intermediate phase of WO<sub>3-x</sub> is formed, during which the oxide is sulfurized in next step as indicated by equation (1) & (2); this is followed by additional sulfurization to complete the correct substitution of sulfur for the unsaturated oxygen atoms formed during the first intermediate reaction.

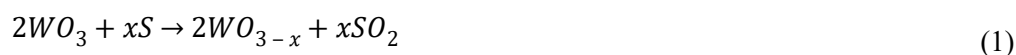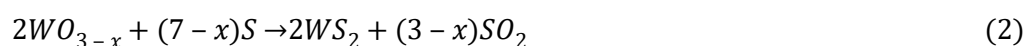

To prevent additional by-products, such as multi-layer growth of WS<sub>2</sub>, a quick cooling step must be performed once the deposition period is completed. The systematic optimized temperature profile of both precursors during the entire process has been depicted in Figure S1b. Further, several standard microscopic and spectroscopic techniques have been carried out to validate the experimental results.

The optical micrographs of APCVD grown monolayer WS<sub>2</sub> on Si substrate at different magnifications are shown in Figure S1c. These optical micrographs disclose intricate details about the shape of as synthesized monolayer WS<sub>2</sub>. The optical contrast between the monolayer WS<sub>2</sub> and substrate provides clear visualization of layer uniformity. The morphologies of monolayer WS<sub>2</sub> synthesized by APCVD unveil a triangle shaped structure with a maximum lateral size of 26.26±0.16 μm as illustrated in Figure S1c.

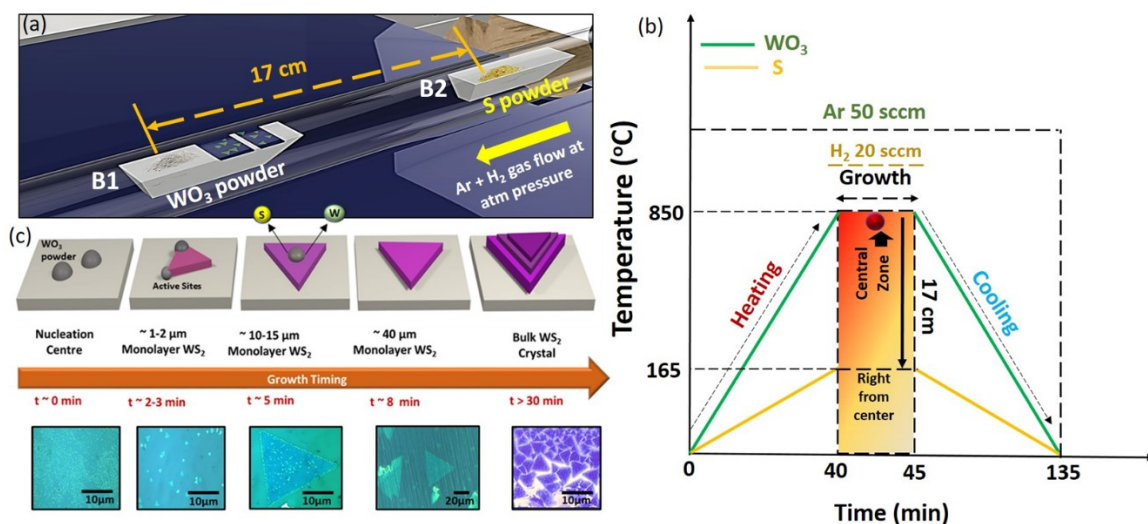

**Figure 1.** (a) Pictorial representation of indigenously laboratory developed APCVD setup for synthesis of monolayer WS<sub>2</sub>, arrangement of precursors and substrate inside the furnace at central heating zone region. (b) Temperature profile of precursors inside quartz tube of horizontal split furnace, (c) systematic optimization process of growth of monolayer WS<sub>2</sub> and their respective optical images, scale bar is mentioned.

**Table TS1. Steps of optimizing growth parameters**

| Distance between precursors (cm) | Precursor amount (mg)                                                           | Temperature (° C) | Ramping Rate (° C/min) | Growth Time (mins) | Pressure | Flow rate of H <sub>2</sub> (sccm) | Flow rate of Ar (sccm) | Position of substrates | No. of layers          |
|----------------------------------|---------------------------------------------------------------------------------|-------------------|------------------------|--------------------|----------|------------------------------------|------------------------|------------------------|------------------------|
| 24 cm                            | WO <sub>3</sub> ~ 15 mg<br>S ~ 100 mg                                           | 800° C            | 18° C/min              | 5 mins             | 1 Atm    | No H <sub>2</sub>                  | 350 sccm               | Face down              | Multi-layer            |
| 22 cm                            | WO <sub>3</sub> – 20 mg<br>S – 20 mg                                            | 850° C            | 18° C/min              | 5 mins             | 1 Atm    | No H <sub>2</sub>                  | 350 sccm               | Face down              | Multi-layer            |
| 21 cm                            | WO <sub>3</sub> -100 mg<br>Na <sub>2</sub> S <sub>2</sub> O <sub>3</sub> -100mg | 875° C            | 25° C/min              | 10 mins            | 1 Atm    | No H <sub>2</sub>                  | 250 sccm               | Face down              | Multilayer             |
| 20 cm                            | WO <sub>3</sub> -15.6 mg<br>S – 103 mg                                          | 850° C            | 19° C/min              | 5 mins             | 1 Atm    | No H <sub>2</sub>                  | 500 sccm               | Face down              | Monolayer (~1-2 μm)    |
| 17 cm                            | WO <sub>3</sub> – 50 mg<br>S – 100 mg                                           | 870° C            | 25 °/min               | 10 mins            | 1 Atm    | 10 sccm                            | 250 sccm               | Face down              | Monolayer (~ 40 μm)    |
| 17 cm                            | WO <sub>3</sub> – 50 mg<br>S – 100 mg                                           | 870° C            | 25 °/min               | 5 mins             | 1 Atm    | 10 sccm                            | 250 sccm               | Face down              | Monolayer (~ 10-20 μm) |

After several statistical runs using different growth conditions, we have optimized the growth parameters for monolayer WS<sub>2</sub>. Using the optimized growth parameters: 17 cm precursor distance, 870° C growth temperature, 25° C/min ramping rate, 10 minutes growth time, and gas flows of 10 sccm H<sub>2</sub> and 250 sccm Ar, we successfully synthesized monolayer WS<sub>2</sub> films. This process was repeated 23 times under the same conditions, consistently resulting in triangular monolayer WS<sub>2</sub> domains ranging from 30 to 40 μm in size.

## S2. Statistical areal density analysis of monolayer WS<sub>2</sub>

SEM images are analyzed using software ImageJ and further statistical areal triangular density of monolayer WS<sub>2</sub> was calculated with standard procedure. Figure S2 represents the image of calculated number of synthesized monolayer WS<sub>2</sub> in chosen area using ImageJ software. The statistical histogram of covered monolayer WS<sub>2</sub> area versus the number of counts has been depicted and inset shows the

selected region for analysis, scale bar is mentioned. It is clearly evident that maximum number of monolayer WS<sub>2</sub> is grown in areal range 0-200 μm<sup>2</sup>.

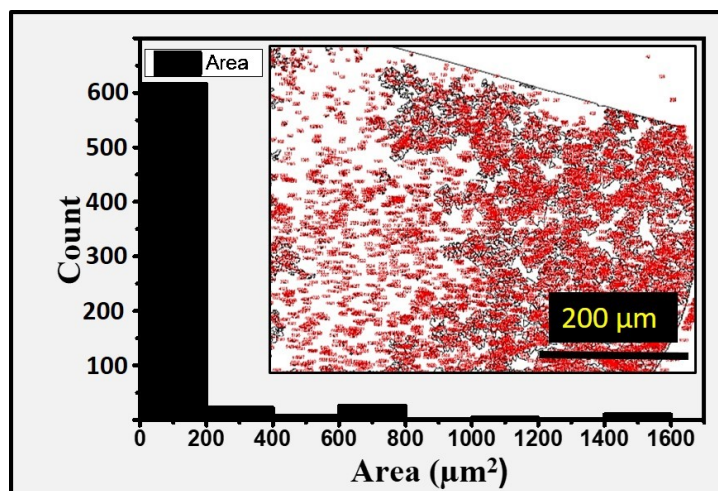

**Figure 2.** Statistical areal density analysis of monolayer WS<sub>2</sub>.

### S3. Transfer protocol for TEM grid

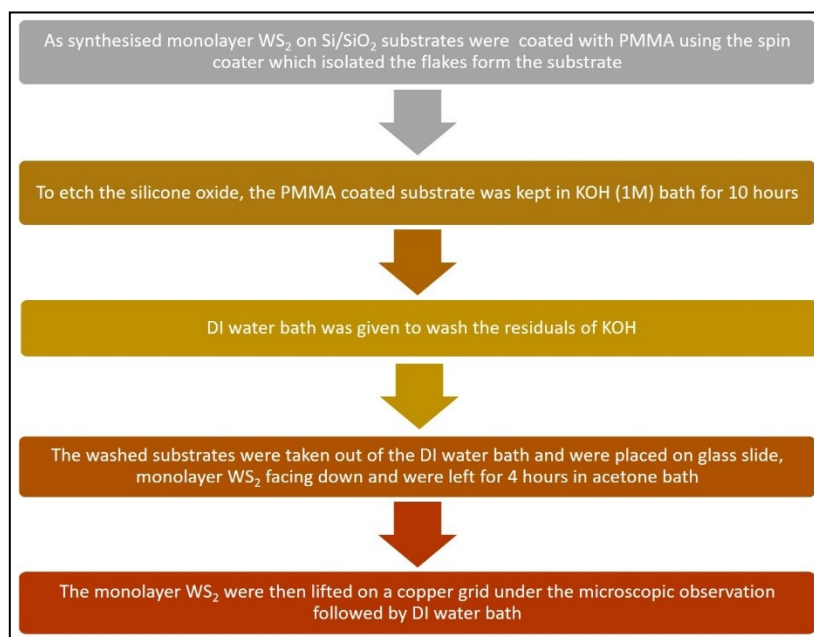

**Figure 3.** Transfer protocol for TEM grid.

#### S4. TEM characterization of monolayer WS<sub>2</sub>

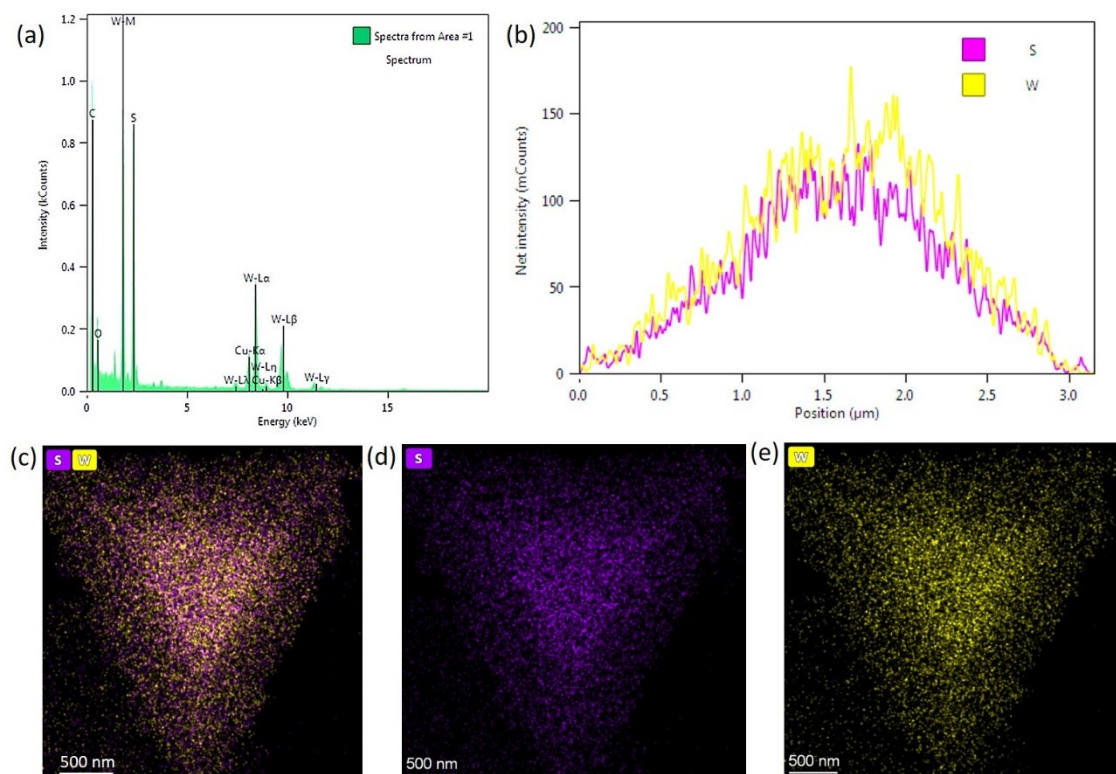

**Figure 4.** TEM characterization of monolayer WS<sub>2</sub> (a-b) Elemental scan survey of monolayer WS<sub>2</sub>. (c-e) TEM mapping images of monolayer WS<sub>2</sub>.

#### S5. XPS results

W in WS<sub>2</sub> may be found in a variety of oxidation states, including W<sup>4+</sup> and W<sup>6+</sup>, which represent various chemical environments or accountabilities. S may also exhibit variations in its coordination or oxidation state depending on the surface chemistry. The oxidation state affects an element's highest binding energy position. The typical C 1s peak (284.6 eV) is utilized as a standard reference, to rectify the shifts in respective intensities. For the W atom, two distinct XPS peaks of WS<sub>2</sub> has been found at binding energies of 34.7 eV, and 37.9 eV, which correspond to the W4f<sub>7/2</sub>, and W4f<sub>5/2</sub> core energy levels, respectively as shown in Figure 1h. The W4f<sub>7/2</sub>, represented by 4+ valence state exhibits that sufficient sulfurization of WO<sub>3</sub> precursor has been consumed during the APCVD process. W in monolayer WS<sub>2</sub> has an electropositive characteristic that functions as an electron acceptor when it has a valence electronic configuration of 6s<sup>2</sup>5d<sup>4</sup>. The high-resolution XPS spectra of the S 2p doublet in the pristine WS<sub>2</sub> monolayers are shown in Figure 1i, confirming the successful deposition of WS<sub>2</sub> by APCVD technique. The S 2p<sub>3/2</sub> and S 2p<sub>1/2</sub> binding energies were found to be approximately 162.4 and 163.7 eV,

respectively, and were associated with the  $S^{2-}$  and  $S_2^{2-}$ -species. Electronegative  $S^{2-}$  (electron donor) ions from S based vapor can effectively inject electrons into  $WS_2$  monolayers by occupying S vacancies or being absorbed by  $WO_{3-x}$  species at the location of the vacancies.

### S6. THz result analysis by Tinkham approximation

**Tinkham approximation** has been considered a fundamental tool in time domain terahertz data analysis for thin films, enabling us to extract optical parameters such as transmission and conductivity. The recorded spectrum in time domain further converted in frequency domain by Fast Fourier Transformation (FFT) following the equation (1).

$$E(t) \xrightarrow{FT} \frac{1}{\sqrt{2\pi}} \int_{-\infty}^{+\infty} E(t) e^{-i\omega t} dt = E(\omega) \quad (1)$$

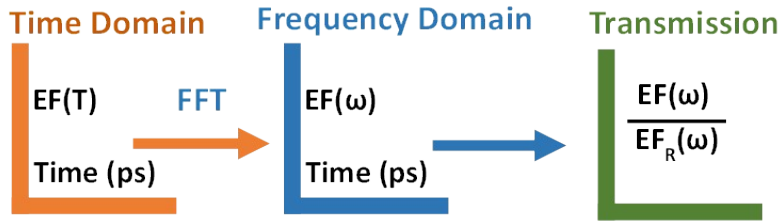

Further transmission and conductivity spectra have been obtained by using following relations:

$$T(\omega) = \frac{FFT(E_{sample})}{FFT(E_{substrate})} \quad (2)$$

$$\sigma(\omega) = \frac{1+n}{dZ_0} \left( \frac{1}{T(\omega)} - 1 \right) \quad (3)$$

here;

FFT: Fast Fourier transformation

$T(\omega)$ : Transmission

$n_s$ : refractive index of substrate

$Z_0$ : vacuum impedance (377 ohm)

$E_{sample}(\omega)$ : THz EF signal through sample

$E_{substrate}(\omega)$ : THz EF signal through bare substrate

Further the Tinkham approximation results connect by fitting experimental data to the transmittance equation. The Drude-Smith model extends the Drude model to account for carrier localization or backscattering effects with quantum confinement,

$$\sigma(\omega) = \sigma_1(\omega) + \sigma_2(\omega) \quad (4)$$

$\sigma_1(\omega)$ : represents the real part of complex conductivity

$\sigma_2(\omega)$ : represents the complex part of complex conductivity

$$\sigma(\omega) = \frac{e^2 n_e \tau}{m_e (1 - i\omega\tau)} \left[ 1 + \frac{C}{1 - i\omega\tau} \right] \quad (5)$$

$e$ : the elementary charge,

$n_e$ : the charge carrier concentration in monolayer WS<sub>2</sub>,

$\tau$ : the charge carrier relaxation time.

The charge carrier concentration  $n_e(T) \propto e^{-E_g/k_B T}$ , relation signify the temperature dependent conductivity of monolayer WS<sub>2</sub>.

## S7. THz-TDS result analysis at different temperature by Tinkham approximation

- I. **decreasing temperature (cooling):** The terahertz time-domain spectroscopy (THz-TDS) signal response was likewise documented throughout the cooling process, as depicted in Figure S5. The resulting data corroborates the findings obtained during the heating phase, thereby further validating the authenticity of the results.

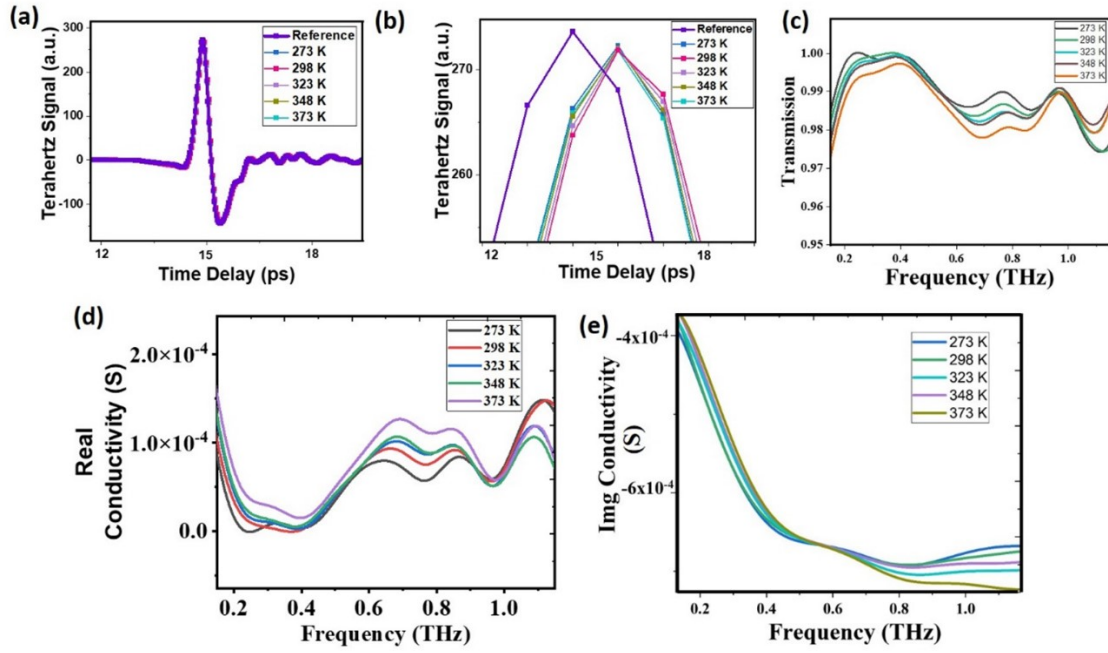

**Figure 5.** (a) THz signal transmitted through monolayer  $\text{WS}_2$  on Si substrate. (b) Magnified view of transmitted THz pulse. (c) Transmitted THz amplitude through monolayer  $\text{WS}_2$  grown on Si substrate. (d) Extracted real part of sheet conductivity of monolayer  $\text{WS}_2$  on Si substrate in THz frequency domain. (e) Extracted imaginary part of sheet conductivity of monolayer  $\text{WS}_2$  on Si substrate in THz frequency domain.

## II. Increasing temperature (heating):

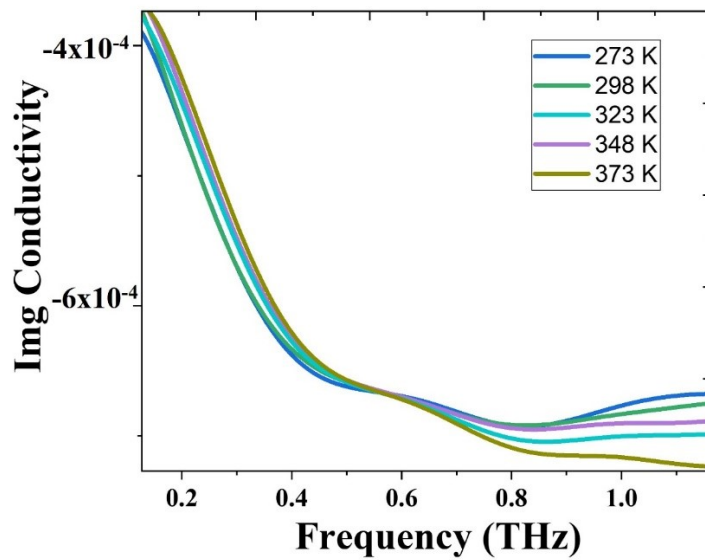

**Figure 6.** Extracted imaginary part of sheet conductivity of monolayer  $\text{WS}_2$  on Si substrate in THz frequency domain.



### III. Conductivity Error Analysis:

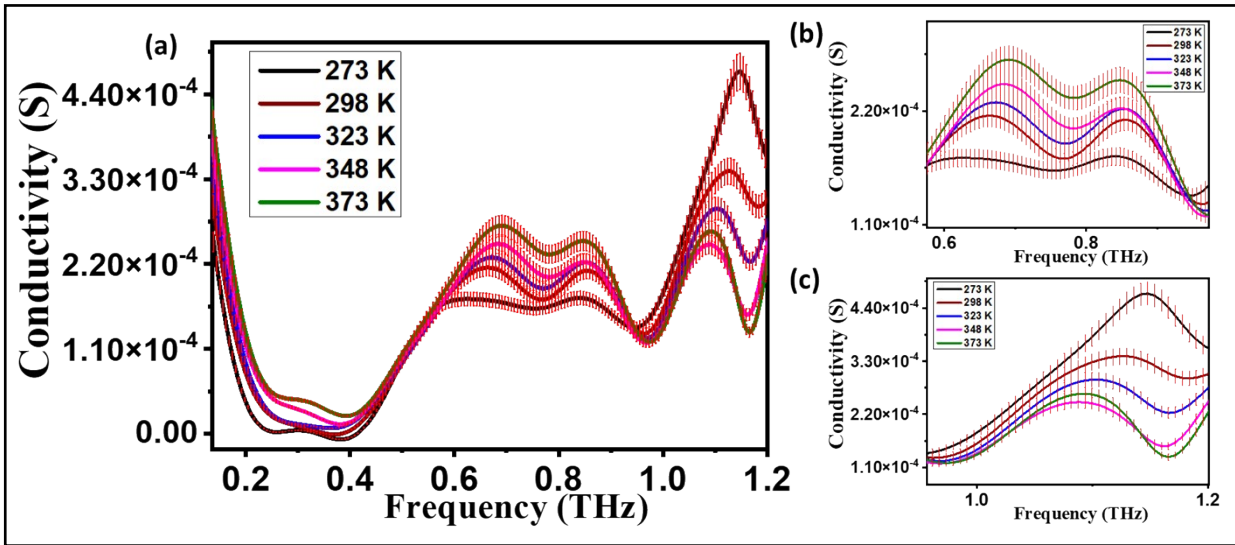

**Figure 7.** (a) Error analysis of conductivity spectrum at different temperatures. (b-c) enlarged view of (a) at different frequency domain.
